# Supplementary material
Source: publisher figshare collection journal article supplement (https://tandf.figshare.com/ndownloader/files/12558626)
Supplement: Supplementary file 1 [file 12558626]

## Sheet: Sheet1
Supplementary Table 1. Geographic, climate and host- information for endophytes from Arizona deposited in the Robert L. Gilbertson Mycological Herbarium, 2005-2014.
Site No.	Site	Latitude	Longitude	Altitude (m)	Mean annual precipitation (mm)	Mean annual temperature (°C)	Region	Elevation code	Biotic community	Host group	Host Family	Host species	Tissue	Number of isolates*
1	Roof Butte	36.461	-109.096	2789	524.3	5	N	Mountain	Petran	Lichen	Unknown	Unknown Lichen	Lichen	237
										Gymnosperm	Cupressaceae	Juniperus deppeana	Leaf	1
												Juniperus osteosperma	Leaf	14
												Juniperus scopulorum	Leaf	92
											Pinaceae	Pinus ponderosa	Leaf	451
										Angiosperm	Asteraceae	Erigeron sp.	Leaf	4
													Stem	12
													Root	63
												Senecio sp.	Leaf	9
													Stem	16
													Root	50
2	Clints Well	34.555	-111.316	2107.1	640.2	9	C	Mountain	Petran	Gymnosperm	Cupressaceae	Juniperus deppeana	Leaf	22
											Pinaceae	Pinus ponderosa	Leaf	28
3	Flagstaff	35.198	-111.651	2108.3	532.5	8.1	C	Mountain	Petran	Gymnosperm	Pinaceae	Pinus ponderosa	Leaf	2
4	Iron Springs	34.585	-112.57	1859.8	542.1	10.7	C	Mountain	Petran	Gymnosperm	Cupressaceae	Juniperus deppeana	Leaf	34
											Pinaceae	Pinus ponderosa	Leaf	17
										Angiosperm	Fagaceae	Quercus gambelli	Leaf	1
											Fagaceae	Quercus grisea	Leaf	7
											Fagaceae	Quercus turbinella	Leaf	41
5	Lower Lake Mary	35.106	-111.573	2088	538.1	8.4	C	Mountain	Petran	Angiosperm	Hydrocharitaceae	Elodea bifoliata	Aquatic leaf	1
											Polygonaceae	Persicaria amphibia	Leaf	7
													Aquatic leaf	14
													Aquatic root	13
											Potamogetonaceae	Stuckenia pectinata	Aquatic leaf	7
													Aquatic root	12
6	Mingus Mountain	34.694	-112.128	2318.5	706.1	7.8	C	Mountain	Petran	Gymnosperm	Cupressaceae	Juniperus deppeana	Leaf	18
											Pinaceae	Pinus ponderosa	Leaf	22
7	Morton Lake	34.893	-111.294	2151.4	550.8	8.4	C	Mountain	Petran	Angiosperm	Polygonaceae	Persicaria amphibia	Leaf	3
													Aquatic root	10
8	Mud Lake	34.923	-111.355	2188.7	564.2	8	C	Mountain	Petran	Angiosperm	Hydrocharitaceae	Elodea bifoliata	Aquatic root	1
											Polygonaceae	Persicaria amphibia	Leaf	1
													Aquatic root	7
9	Stoneman Lake	34.78	-111.519	2054.1	615.2	9.3	C	Mountain	Petran	Angiosperm	Hydrocharitaceae	Elodea bifoliata	Aquatic leaf	4
													Aquatic root	12
											Haloragaceae	Myriophyllum sibericum	Aquatic leaf	4
													Aquatic root	3
											Polygonaceae	Persicaria amphibia	Leaf	2
													Aquatic leaf	7
													Aquatic root	8
											Potamogetonaceae	Stuckenia pectinata	Aquatic leaf	1
10	Watson Lake	34.587	-112.418	1579.9	442.2	12.6	C	Mountain	Petran	Angiosperm	Polygonaceae	Persicaria amphibia	Leaf	4
													Aquatic leaf	8
													Aquatic root	10
											Potamogetonaceae	Stuckenia pectinata	Aquatic leaf	15
													Aquatic root	4
11	Willow Creek Res	34.604	-112.44	1565.4	427.2	12.6	C	Mountain	Petran	Angiosperm	Hydrocharitaceae	Elodea bifoliata	Aquatic root	1
											Polygonaceae	Persicaria amphibia	Leaf	2
													Aquatic leaf	12
													Aquatic root	40
											Potamogetonaceae	Stuckenia pectinata	Aquatic leaf	6
													Aquatic root	6
12	East Verde River	34.299	-111.358	1408.9	545.4	13.8	C	Transition	Petran	Angiosperm	Ericaceae	Arctostaphylos pungens	Leaf	8
											Oleaceae	Fraxinus velutina	Leaf	22
											Salicaceae	Populus fremontii	Leaf	2
											Fagaceae	Quercus turbinella	Leaf	18
13	Oak Creek Canyon	34.884	-111.744	1419	511.9	14.4	C	Transition	Petran	Angiosperm	Ericaceae	Arctostaphylos pungens	Leaf	2
											Oleaceae	Fraxinus velutina	Leaf	5
											Salicaceae	Populus fremontii	Leaf	2
											Fagaceae	Quercus turbinella	Leaf	15
14	Red Tank Draw	34.684	-111.721	1187.5	426.6	15.9	C	Transition	Petran	Angiosperm	Oleaceae	Fraxinus velutina	Leaf	3
											Fagaceae	Quercus turbinella	Leaf	25
15	Verde River Camp Verde	34.579	-111.853	947.3	366.4	16.9	C	Transition	Petran	Angiosperm	Oleaceae	Fraxinus velutina	Leaf	1
											Berberidaceae	Mahonia fremontii	Leaf	3
16	Rock Springs	34.06	-112.11	717.3	379.2	19.2	C	Lowland	Petran	Angiosperm	Fabaceae	Parkinsonia microphylla	Stem	29
											Viscaceae	Phoradendron californicum	Stem	2
											Simmondsiaceae	Simmondsia chinensis	Stem	11
											Zygophyllaceae	Larrea tridentata	Leaf	4
													Stem	25
17	Bear Wallow	32.422	-110.73	2409.6	750.3	9.8	SE	Mountain	Madrean	Moss	Brachytheciaceae	Brachythecium fendleri	Leaf	68
										Gymnosperm	Pinaceae	Pinus leiophylla	Leaf	50
												Pinus ponderosa	Leaf	57
												Pseudotsuga menziesii	Leaf	71
18	Butterfly Trail	32.43	-110.741	2300.6	722.7	10.5	SE	Mountain	Madrean	Gymnosperm	Pinaceae	Pinus ponderosa	Leaf	26
19	Chiricahua Mountains	31.883	-109.205	1672.4	490.6	13	SE	Mountain	Madrean	Lichen	Lecideaceae	Lecidea tessellata	Lichen	36
											Parmeliaceae	Flavoparmelia praesignis	Lichen	64
												Pseudevernia intensa	Lichen	61
												Punctelia hypoleucites	Lichen	97
												Usnea hirta	Lichen	45
												Xanthoparmelia viriduloumbrina	Lichen	56
											Peltigeraceae	Peltigera canina	Lichen	19
												Peltigera rufescens	Lichen	44
											Physciaceae	Physcia caesia	Lichen	70
											Thelotremataceae	Diploschistes muscorum	Lichen	35
											Verrucariaceae	Dermatocarpon sp.	Lichen	14
												Dermatocarpon tenue	Lichen	6
										Moss	Ditrichaceae	Ceratodon purpureus	Leaf	30
											Leucobryaceae	Leucobryum sp.	Leaf	19
										Fern	Woodsiaceae	Woodsia plummerae	Leaf	5
										Gymnosperm	Cupressaceae	Juniperus deppeana	Leaf	83
													Dead leaf	81
													Leaf Litter	37
											Pinaceae	Pinus arizonica	Leaf	9
													Dead leaf	31
													Leaf Litter	55
											Pinaceae	Pseudotsuga menziesii	Leaf	16
													Dead leaf	19
													Leaf Litter	25
										Angiosperm	Fagaceae	Quercus gambelli	Leaf	1
												Quercus hypoleucoides	Leaf	31
												Quercus rugosa	Dead leaf	32
													Leaf Litter	27
											Oleaceae	Fraxinus velutina	Leaf	1
											Poaceae	Eragrostis intermedia	Leaf	2
20	Green Mountain / Bug Springs	32.374	-110.689	1917.2	612.9	13	SE	Mountain	Madrean	Gymnosperm	Pinaceae	Pinus ponderosa	Leaf	77
21	Marshall Gulch	32.437	-110.76	2419.5	756.6	9.8	SE	Mountain	Madrean	Lichen	Peltigeraceae	Peltigera canina	Lichen	1
												Peltigera neopolydactyla	Lichen	32
												Peltigera sp.	Lichen	7
											Parmeliaceae	Usnea sp.	Lichen	2
											Umbilicariaceae	Lasallia hispana	Lichen	49
										Gymnosperm	Pinaceae	Pinus ponderosa	Leaf	38
22	Middle Bear	32.372	-110.691	1910.1	611.7	13.1	SE	Mountain	Madrean	Gymnosperm	Cupressaceae	Juniperus deppeana	Leaf	111
											Pinaceae	Pinus ponderosa	Leaf	265
										Angiosperm	Fagaceae	Quercus emoryi	Leaf	7
												Quercus grisea	Leaf	7
												Quercus hypoleucoides	Leaf	601
												Quercus rugosa	Leaf	2
23	Parking Pullout South of Rose Canyon	32.39	-110.695	2180.7	684.5	11.3	SE	Mountain	Madrean	Gymnosperm	Pinaceae	Pinus ponderosa	Leaf	40
24	Pullout South of Willow Canyon Rd	32.385	-110.694	2118.8	667.3	11.7	SE	Mountain	Madrean	Gymnosperm	Pinaceae	Pinus ponderosa	Leaf	13
25	Rose Canyon Rd	32.395	-110.691	2287.5	713	10.6	SE	Mountain	Madrean	Gymnosperm	Pinaceae	Pinus ponderosa	Leaf	45
26	Santa Rita Mountains	31.728	-110.842	2362	736.3	10.6	SE	Mountain	Madrean	Gymnosperm	Cupressaceae	Juniperus deppeana	Leaf	287
										Angiosperm	Fagaceae	Quercus hypoleucoides	Leaf	236
27	Sunset Trail	32.427	-110.746	2392.4	747.3	10	SE	Mountain	Madrean	Gymnosperm	Pinaceae	Pinus ponderosa	Leaf	26
28	Upper Soldiers Camp Rd.	32.427	-110.738	2337	731.9	10.3	SE	Mountain	Madrean	Gymnosperm	Pinaceae	Pinus ponderosa	Leaf	15
29	Aravaipa Canyon	32.879	-110.584	851.6	380.9	19	SE	Transition	Neotropical	Lichen	Parmeliaceae	Xanthoparmelia sp.	Lichen	146
30	Catalina	32.5	-110.921	950.4	395.5	19.3	SE	Transition	Neotropical	Gymnosperm	Ephedraceae	Ephedra trifurca	Stem	1
										Angiosperm	Fabaceae	Parkinsonia microphylla	Stem	6
											Zygophyllaceae	Larrea tridentata	Leaf	2
												Larrea tridentata	Stem	11
31	Dragoon	32.017	-110.042	1417.6	364.1	15.8	SE	Transition	Madrean	Gymnosperm	Ephedraceae	Ephedra trifurca	Stem	17
										Angiosperm	Zygophyllaceae	Larrea tridentata	Leaf	4
													Stem	20
32	Fort Bowie	32.202	-109.431	1265	326.6	16.2	SE	Transition	Madrean	Gymnosperm	Ephedraceae	Ephedra trifurca	Stem	4
										Angiosperm	Zygophyllaceae	Larrea tridentata	Leaf	12
													Stem	15
33	Madera Canyon	31.739	-110.886	1374.9	519.1	16.2	SE	Transition	Madrean	Gymnosperm	Pinaceae	Pinus ponderosa	Leaf	44
										Angiosperm	Fagaceae	Quercus arizonica	Leaf	14
												Quercus emoryi	Leaf	2
												Quercus grisea	Leaf	2
												Quercus hypoleucoides	Leaf	22
												Quercus rugosa	Leaf	3
34	Sahuarita	31.958	-110.956	828.8	322.4	19.5	SE	Transition	Neotropical	Gymnosperm	Ephedraceae	Ephedra trifurca	Stem	6
										Angiosperm	Fabaceae	Parkinsonia microphylla	Stem	1
											Zygophyllaceae	Larrea tridentata	Leaf	4
													Stem	10
35	Santa Rita Exp Range	31.783	-110.85	1218.8	465.2	25.4	SE	Transition	Madrean	Angiosperm	Fabaceae	Prosopis glandulosa	Leaf	27
													Dead leaf	19
											Poaceae	Eragrostis lehmanniana	Leaf	3
													Dead leaf	15
													Stem	79
													Root	175
													Unknown	27
36	Tubac	31.613	-111.046	980.8	394.8	17.7	SE	Transition	Madrean	Angiosperm	Fabaceae	Parkinsonia microphylla	Stem	59
37	Tucson Mountains	32.225	-111.117	859.6	343	19.7	SE	Transition	Neotropical	Gymnosperm	Ephedraceae	Ephedra aspera	Stem	9
											Ephedraceae	Ephedra trifurca	Stem	165
										Angiosperm	Asteraceae	Ambrosia deltoidea	Leaf	1
													Stem	5
												Trixis californica	Leaf	1
											Cactaceae	Carnegeia gigantea	Fruit	195
											Fabaceae	Olneya tesota	Stem	12
												Parkinsonia microphylla	Stem	266
											Viscaceae	Phoradendron californicum	Stem	77
											Simmondsiaceae	Simmondsia chinensis	Leaf	33
													Stem	154
											Zygophyllaceae	Larrea tridentata	Leaf	52
													Stem	178
38	Vail	32.001	-110.701	1043.8	377	18.3	SE	Transition	Neotropical	Angiosperm	Fabaceae	Parkinsonia microphylla	Stem	12
											Zygophyllaceae	Larrea tridentata	Leaf	18
													Stem	31
39	Willcox	32.129	-110.009	1402.5	358.5	15.6	SE	Transition	Madrean	Angiosperm	Zygophyllaceae	Larrea tridentata	Leaf	12
													Stem	22
40	Rillito River at 1st Avenue	32.29	-110.963	707.5	305.6	20.3	SE	Lowland	Neotropical	Angiosperm	Asteraceae	Verbesina encelioides	Stem	2
													Root	1
											Malvaceae	Gossypium thurberi	Root	1
													Stem	25
												Malva parvifolia	Stem	2
											Solanaceae	Datura wrightii	Stem	1
41	Casa Grande Mountain Park	32.9	-111.53	438.5	306.1	21.1	SE	Lowland	Neotropical	Gymnosperm	Ephedraceae	Ephedra trifurca	Stem	2
										Angiosperm	Fabaceae	Parkinsonia microphylla	Stem	5
											Zygophyllaceae	Larrea tridentata	Leaf	2
													Stem	28
42	Central Tucson	32.232	-110.95	741.9	300.8	20.6	SE	Lowland	Neotropical	Gymnosperm	Cupressaceae	Cupressus arizonica	Leaf	16
													Stem	8
													Twig	32
												Juniperus deppeana	Leaf	11
												Platycladus orientalis	Leaf	34
										Angiosperm	Adoxaceae	Viburnum sp.	Leaf	1
											Araliaceae	Hedera sp.	Leaf	7
											Asparagaceae	Agave palmeri	Nectar	16
											Fabaceae	Parkinsonia microphylla	Stem	54
												Quercus sp.	Leaf	1
											Krameriaceae	Krameria grayi	Stem	4
											Platanaceae	Platanus wrightii	Stem	1
													Twig	5
											Salicaceae	Populus fremontii	Leaf	4
											Viscaceae	Phoradendron californicum	Stem	8
											Simmondsiaceae	Simmondsia chinensis	Leaf	4
													Stem	11
											Solanaceae	Datura wrightii	Nectar	60
											Zygophyllaceae	Larrea tridentata	Leaf	2
													Stem	1
43	Santa Cruz River at Grant Road	32.25	-110.997	703.4	299.3	20.5	SE	Lowland	Neotropical	Angiosperm	Asteraceae	Machaerantha sp.	Stem	1
												Verbesina encelioides	Stem	3
													Root	3
											Brassicaceae	Sisymbrium irio	Stem	3
													Root	2
											Fabaceae	Senna covesii	Stem	3
													Root	8
											Malvaceae	Sphaeralcea sp.	Stem	1
											Poaceae	Cenchrus ciliaris	Stem	3
													Root	3
												Cynodon dactylon	Stem	7
											Portulacaceae	Portulaca oleracea	Stem	4
													Root	1
											Solanaceae	Datura wrightii	Stem	2
													Root	2
												Nicotiana trigonophylla	Stem	10
44	Picacho Peak	32.646	-111.401	568	329.8	20.8	SE	Lowland	Neotropical	Gymnosperm	Ephedraceae	Ephedra aspera	Stem	16
										Angiosperm	Fabaceae	Parkinsonia microphylla	Stem	27
											Simmondsiaceae	Simmondsia chinensis	Leaf	3
													Stem	3
											Zygophyllaceae	Larrea tridentata	Leaf	12
													Stem	20
45	Rillito	32.415	-111.156	623	315.5	20.7	SE	Lowland	Neotropical	Angiosperm	Asteraceae	Baccharis sarothroides	Leaf	1
											Fabaceae	Parkinsonia microphylla	Stem	30
												Prosopis glandulosa	Stem	6
											Viscaceae	Phoradendron californicum	Leaf	1
													Stem	15
											Simmondsiaceae	Simmondsia chinensis	Leaf	1
													Stem	13
											Zygophyllaceae	Larrea tridentata	Leaf	3
													Stem	55
46	Rillito River at Swan Rd.	32.272	-110.894	735.6	306.1	20.6	SE	Lowland	Neotropical	Angiosperm	Asteraceae	Lactuca serriola	Stem	7
												Verbesina encelioides	Stem	16
													Root	2
											Brassicaceae	Sisymbrium irio	Stem	4
													Root	4
											Malvaceae	Malva parvifolia	Stem	4
													Root	2
												Sphaeralcea sp.	Stem	6
													Root	2
											Solanaceae	Datura wrightii	Stem	10
													Root	4
												Nicotiana trigonophylla	Stem	16
												Solanum sp.	Stem	14
47	Ajo	32.372	-112.861	536.4	206	22.1	SW	Lowland	Neotropical	Angiosperm	Zygophyllaceae	Larrea tridentata	Stem	22
48	Cibola National Wildlife Refuge	33.312	-114.691	67.4	73	22.8	SW	Lowland	Neotropical	Angiosperm	Amaranthaceae	Atriplex canescens	Leaf	3
49	Gila Bend	33.01	-112.615	268.1	150.4	22.1	SW	Lowland	Neotropical	Angiosperm	Fabaceae	Parkinsonia microphylla	Stem	1
											Zygophyllaceae	Larrea tridentata	Leaf	4
													Stem	6
50	Lake Havasu	34.467	-114.376	136.7	116.2	23	SW	Lowland	Neotropical	Angiosperm	Fabaceae	Parkinsonia microphylla	Stem	5
											Zygophyllaceae	Larrea tridentata	Leaf	6
													Stem	21
51	North I-8 Ex151	32.837	-112.135	558.3	237.2	20.6	SW	Lowland	Neotropical	Gymnosperm	Ephedraceae	Ephedra aspera	Stem	4
										Angiosperm	Fabaceae	Parkinsonia microphylla	Stem	1
											Zygophyllaceae	Larrea tridentata	Leaf	1
													Stem	8
52	Phoenix	33.448	-112.074	328.6	211.3	21.6	SW	Lowland	Neotropical	Angiosperm	Fabaceae	Parkinsonia microphylla	Stem	3
											Viscaceae	Phoradendron californicum	Stem	2
											Zygophyllaceae	Larrea tridentata	Leaf	17
													Stem	51
53	West Mobile	33.055	-112.272	400.9	192	21.1	SW	Lowland	Neotropical	Angiosperm	Fabaceae	Parkinsonia microphylla	Stem	5
											Zygophyllaceae	Larrea tridentata	Leaf	1
													Stem	6
54	White Tanks	33.532	-112.573	666.3	283.5	19.5	SW	Lowland	Neotropical	Angiosperm	Fabaceae	Parkinsonia microphylla	Stem	9
											Simmondsiaceae	Simmondsia chinensis	Stem	3
											Zygophyllaceae	Larrea tridentata	Leaf	1
													Stem	2
*3885 isolates were published from: Hoffman and Arnold, 2008; Hoffman et al., 2008, 2010; U'Ren et al., 2010, 2012, 2014; Lau et al., 2013; Sandberg et al., 2014; Massimo et al., 2015; Huang et al., 2016, Bowman and Arnold (2018). 3719 isolates are unpublished previously.
